# Supplementary material
Source: publisher figshare collection journal article supplement (https://sage.figshare.com/ndownloader/files/14052716)
Supplement: Supplementary file 1 [file 14052716]

## Online supplement

### Search Strategy

#### *PsycInfo*

1. exp homeless mentally ill/
2. (homeless\* or shelter\*).mp.
3. exp homeless/
4. 1 or 2 or 3
5. exp Criminal Justice/ or exp Criminal Behavior/
6. (justice or crime or criminal\* or jail\* or prison\* or imprison\* or police or arrest or incarcerat\* or detention or detain\* or forensic psych\* or offens\* or offend\* or convict\*).mp.
7. 5 or 6
8. \*Mental Disorders/ or exp Schizophrenia/ or exp major depression/ or exp psychosis/ or exp mania/ or exp bipolar disorder/ or exp posttraumatic stress disorder/
9. ("mental\* ill\*" or bipolar\* or depress\* or "mood disorder\*" or schizo\* or psychosis or psychotic or mania or manic or ptsd or "post-traumatic stress" or "posttraumatic stress" or psychiatr\*).mp.
10. 8 or 9
11. 4 and 7 and 10
12. limit 11 to yr="2000 -Current"

#### *Medline*

1. exp Homeless Persons/
2. (homeless\* or shelter\*).mp.

3. 1 or 2
4. exp Crime/ or exp Forensic Psychiatry/ or exp Criminals/
5. (justice or crime or criminal\* or jail\* or prison\* or imprison\* or police or arrest or incarcerat\* or detention or detain\* or forensic psych\* or offens\* or offend\* or convict\*).mp.
6. 4 or 5
7. mental disorders/ or exp "bipolar and related disorders"/ or exp mood disorders/ or exp "schizophrenia spectrum and other psychotic disorders"/
8. ("mental\* ill\*" or bipolar\* or depress\* or "mood disorder\*" or schizo\* or psychosis or psychotic or mania or manic or ptsd or "post-traumatic stress" or "posttraumatic stress" or psychiatr\*).mp.
9. 7 or 8
10. 3 and 6 and 9
11. limit 10 to yr="2000 -Current"

*Embase*

1. exp homeless person/ or exp homeless man/ or exp homeless woman/
2. (homeless\* or shelter\*).mp.
3. 1 or 2
4. criminal behavior/
5. (justice or crime or criminal\* or jail\* or prison\* or imprison\* or police or arrest or incarcerat\* or detention or detain\* or forensic psych\* or offens\* or offend\* or convict\*).mp.
6. 4 or 5

7. \*mental disease/ or exp mood disorder/ or exp psychosis/
8. ("mental\* ill\*" or bipolar\* or depress\* or "mood disorder\*" or schizo\* or psychosis or psychotic or mania or manic or ptsd or "post-traumatic stress" or "posttraumatic stress" or psychiatr\*).mp.
9. 7 or 8
10. 3 and 6 and 9
11. limit 10 to yr="2000 -Current"

*CINAHL*

S1 (MH "Homeless Persons") OR (MH "Homelessness")

S2 homeless\* or shelter\*

S3 (S1 OR S2)

S4 (MH "Crime")

S5 justice OR crime OR criminal\* OR jail\* OR prison\* OR imprison\* OR police OR arrest OR incarcerat\* OR detention OR detain\* OR forensic psych\* OR offens\* OR offend\* OR convict\*

S6 (S4 OR S5)

S7 (MH "Mental Disorders")

S8 "mental\* ill\*" or bipolar\* or depress\* or "mood disorder\*" or schizo\* or psychosis or psychotic or mania or manic or ptsd or "post-traumatic stress" or "posttraumatic stress" or psychiatr\*

S9 (S7 OR S8)

S10 (S3 AND S6 AND S9) Limiters - Published Date: 20000101-20181231

*Web of Science*

TOPIC:(homeless\* or shelter\*) AND TOPIC:(justice OR crime OR criminal\* OR jail\* OR prison\* OR imprison\* OR police OR arrest OR incarcerat\* OR detention OR detain\* OR forensic psych\* OR offens\* OR offend\* OR convict\*) AND TOPIC: ("mental\* ill\*" or bipolar\* or depress\* or "mood disorder\*" or schizo\* or psychosis or psychotic or mania or manic or ptsd or "post-traumatic stress" or "posttraumatic stress" or psychiatr\*)

Timespan: 2000-2018. Indexes: SCI-EXPANDED, SSCI, A&HCI, CPCI-S, CPCI-SSH, BKCI-S, BKCI-SSH, ESCI, CCR-EXPANDED, IC.

### **Data Extracted**

Geographic location, population and definition of homelessness, study design, sample size, nature of control or comparison groups, treatment allocation method or method of selection of comparison group, duration of follow-up, criminal justice outcome and source of data, description of the intervention, nature of justice-related outcome measure, and impact of the intervention on justice-related outcome measure. We also coded whether the intervention targeted the following criminogenic factors for CJI: antisocial personality patterns, procriminal cognitions or attitudes, procriminal friendships or associations, substance abuse, poor engagement in leisure activities, lack of satisfaction at work or school, and lack of satisfaction in relationships.

Figure S1

*Flow diagram of study selection*

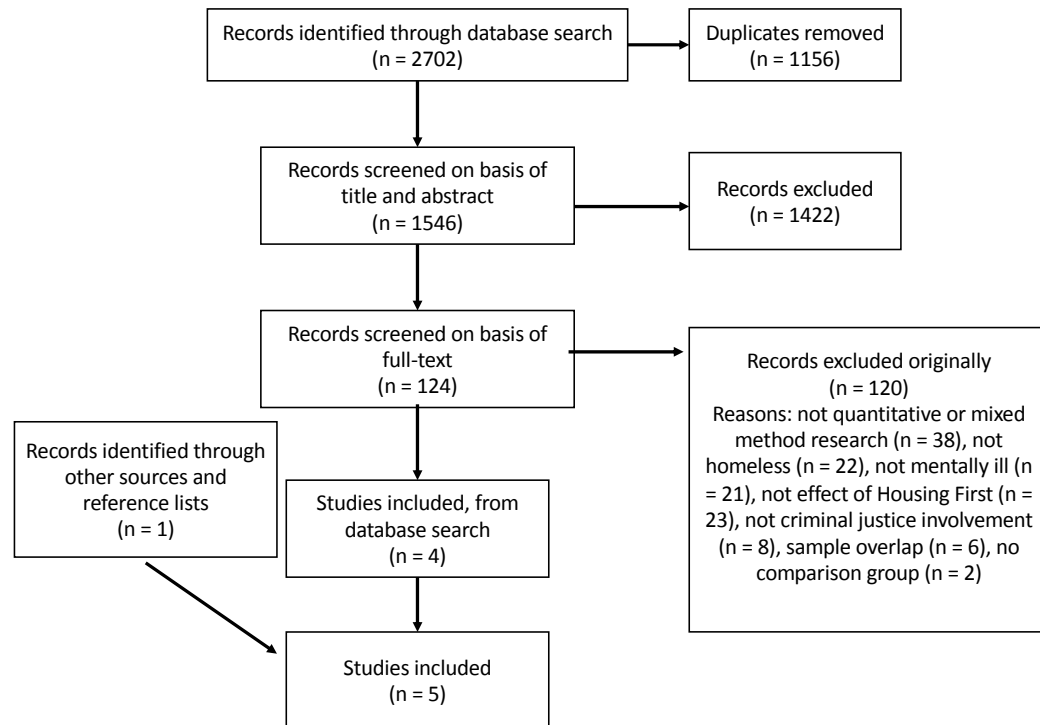

Table S1

*Critical appraisal of observational studies using the ROBINS-I tool*

| Study          | <u>Risk of bias due to...</u> |                           |                                 |                             |              |                         |                               |
|----------------|-------------------------------|---------------------------|---------------------------------|-----------------------------|--------------|-------------------------|-------------------------------|
|                | Confounding                   | Selection of participants | Classification of interventions | Deviations in interventions | Missing data | Measurement of outcomes | Selection of reported results |
| Kriegel 2016   | Moderate                      | Low                       | Low                             | Low                         | Low          | Low                     | Moderate                      |
| Tsai 2010      | Serious                       | Low                       | Serious                         | Low                         | Serious      | Moderate                | Moderate                      |
| Whittaker 2016 | Moderate                      | Moderate                  | Low                             | Low                         | Serious      | Moderate                | Serious                       |

*Note.* Additional details were obtained from protocol when necessary.<sup>1</sup> Studies with low risk in all domains are scored as “low risk of bias” and considered comparable to a well-performed randomised trial. Studies with low or moderate risk in all domains are scored as “moderate risk of bias”, which represents a sound non-randomised study that may not be compared to a well-performed randomised trial. Studies with at least one domain judged as being at serious risk are scored as “serious risk of bias”. Finally, studies with at least one domain judged as being at critical risk are scored as “critical risk of bias” and would be excluded from any analysis.

Table S2

*Critical appraisal of randomized controlled studies using the Cochrane Collaboration's tool*

| Study              | <u>Risk of bias due to...</u> |                        |                                |                         |                     |
|--------------------|-------------------------------|------------------------|--------------------------------|-------------------------|---------------------|
|                    | Random sequence generation    | Allocation concealment | Blinding of outcome assessment | Incomplete outcome data | Selective reporting |
| Aubry 2016         | Low                           | Low                    | Low                            | Low                     | Low                 |
| Stergiopoulos 2015 | Low                           | Low                    | Low                            | Low                     | Low                 |

*Note.* Additional details were obtained from the final report and the protocol when necessary.<sup>2,3</sup> Given that the nature of the interventions prevented blinding of participants, we did not include this item. For blinding of outcome assessment, we rated as 'low risk' if the study used administrative data or validated measurement scales, and as 'high risk' if the outcomes were assessed through an unstructured interview. Studies were considered at high risk of bias if they scored 'high risk' or 'unclear risk' on either random sequence generation or allocation concealment, or if they scored 'high risk' on blinding of outcome assessment. Studies were considered at low risk of bias if they scored low risk on random sequence generation, allocation concealment, and blinding of outcome assessment.

## References

1. Whittaker E, Swift W, Flatau PR, et al. A place to call home: Study protocol for a longitudinal, mixed methods evaluation of two housing first adaptations in Sydney, Australia Health behavior, health promotion and society. BMC Public Health 2015;15(1):342.
2. Goering PN, Veldhuizen S, Watson A, et al. National At Home/Chez Soi final report. Calgary, AB.: Mental Health Commission of Canada; 2014. 48 p.
3. Goering PN, Streiner DL, Adair CE, et al. The At Home/Chez Soi trial protocol: a pragmatic, multi-site, randomised controlled trial of a Housing First intervention for homeless individuals with mental illness in five Canadian cities. BMJ 2011;1(2):e000323.
